# Supplementary material for: Tri-membrane nanoparticles produced by combining liposome fusion and a novel patchwork of bicelles to overcome endosomal and nuclear membrane barriers to cargo delivery
Source: Royal Society of Chemistry journal article supplement (doi:10.1039/c5bm00327j), 2015-12-15
Supplement: c5bm00327j1.pdf [file c5bm00327j1.pdf]

Supplemental Figure 1

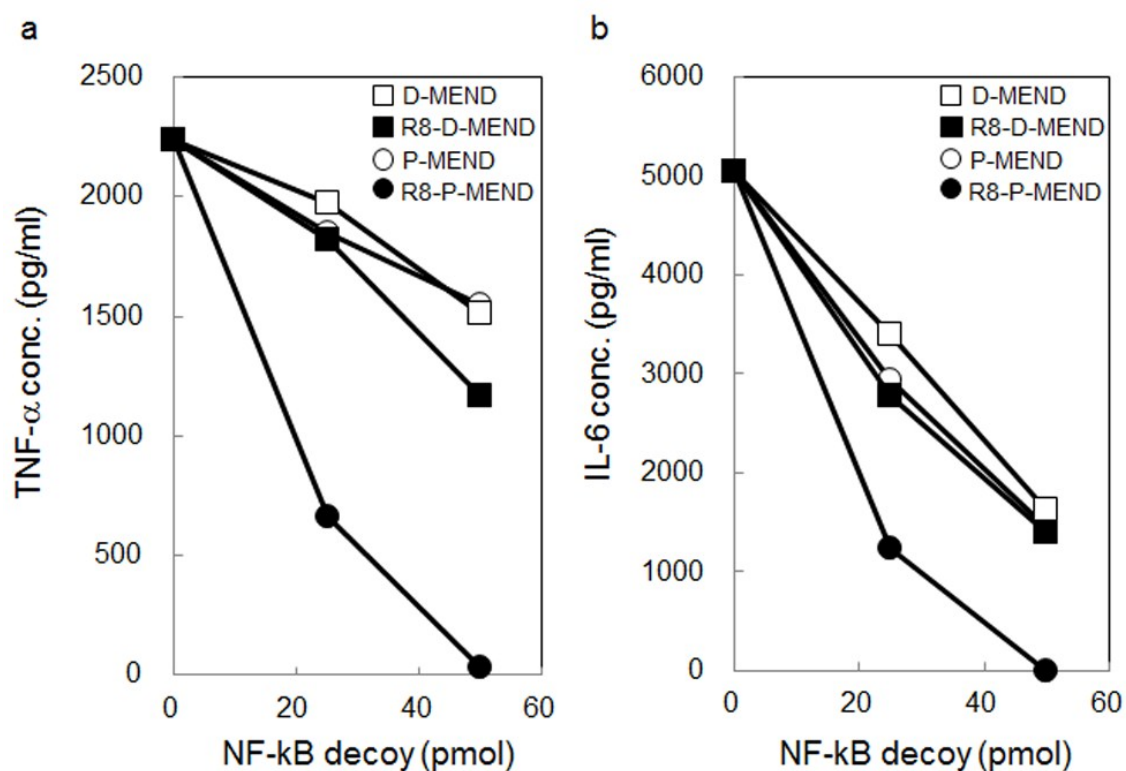

Effect of various MENDs on LPS-induced secretion of TNF- $\alpha$  and IL-6 from dendritic cells  
Various MENDs decreased the levels of TNF- $\alpha$  (a) and IL-6 (b) secreted from BMDCs treated with LPS. Reproducibility of the results was confirmed by repeating the same experiment. □:D-MEND, ■:R8-D-MEND, ○:P-MEND, ●:R8-P-MEND
