# Supplementary material for: Tri-membrane nanoparticles produced by combining liposome fusion and a novel patchwork of bicelles to overcome endosomal and nuclear membrane barriers to cargo delivery
Source: Royal Society of Chemistry journal article supplement (doi:10.1039/c5bm00327j), 2015-12-15
Supplement: c5bm00327j2.pdf [file c5bm00327j2.pdf]

Supplemental Figure 2

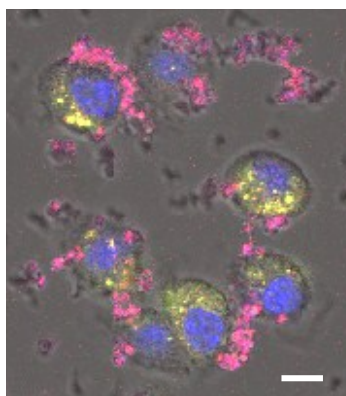

Intracellular distribution of plasmid DNA

Cells were transfected with R8-PD-MEND encapsulating fluorescent-labeled plasmid DNA. After 1 hr, the cells were stained with Lyso Tracker® Green DND-26 for endosome/lysosome and Hoechst33342 for nucleus, respectively, and observed with a confocal laser scanning microscope. Red: plasmid DNA, green: endosome/lysosome, blue: nucleus. The scale bars indicate 10  $\mu\text{m}$ .
