# Supplementary material for: Tri-membrane nanoparticles produced by combining liposome fusion and a novel patchwork of bicelles to overcome endosomal and nuclear membrane barriers to cargo delivery
Source: Royal Society of Chemistry journal article supplement (doi:10.1039/c5bm00327j), 2015-12-15
Supplement: c5bm00327j3.pdf [file c5bm00327j3.pdf]

Supplemental Figure 3

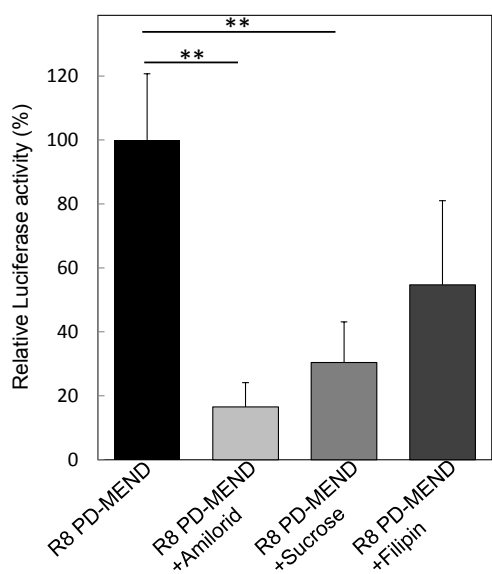

Effects of endocytosis inhibitors on transfection activity

To examine the effect of endocytosis inhibitors, cells were pre-treated for 15 min with inhibitors prior to transfection of R8-PD-MEND. Data are the average  $\pm$ SD of values obtained from 3 different samples. \*\* $p < 0.01$ .
