# Supplementary material for: Tri-membrane nanoparticles produced by combining liposome fusion and a novel patchwork of bicelles to overcome endosomal and nuclear membrane barriers to cargo delivery
Source: Royal Society of Chemistry journal article supplement (doi:10.1039/c5bm00327j), 2015-12-15
Supplement: c5bm00327j4.pdf [file c5bm00327j4.pdf]

Supplemental Table 1

Physicochemical properties of R8-PD-MEND after incubation for 24 hr

| Sample                                                | Diameter (nm) | Polydispersity index | Zeta-potential (mV) |
|-------------------------------------------------------|---------------|----------------------|---------------------|
| R8-PD-MEND                                            | 191.1 ± 18.1  | 0.276 ± 0.014        | 30.4 ± 2.6          |
| R8-PD-MEND incubated<br>in buffer                     | 293.7 ± 94.2  | 0.375 ± 0.038        | 16.4 ± 8.9          |
| R8-PD-MEND incubated<br>in buffer containing<br>serum | 974.5 ± 772.6 | 0.689 ± 0.317        | -27.7 ± 4.7**       |

<sup>1</sup>Data are average ± SD of physicochemical parameters of at least 3 different samples.

\*\*P<0.01 vs R8-PD-MEND and R8-PD-MEND incubated in buffer
